# Supplementary material for: Performance comparison of nano-Al2O3-modified PVDF membranes fabricated via two methods for enhanced dye removal
Source: Royal Society of Chemistry journal article supplement (doi:10.1039/d4ra08615e), 2025-01-01
Supplement: d4ra08615e1.pdf [file d4ra08615e1.pdf]

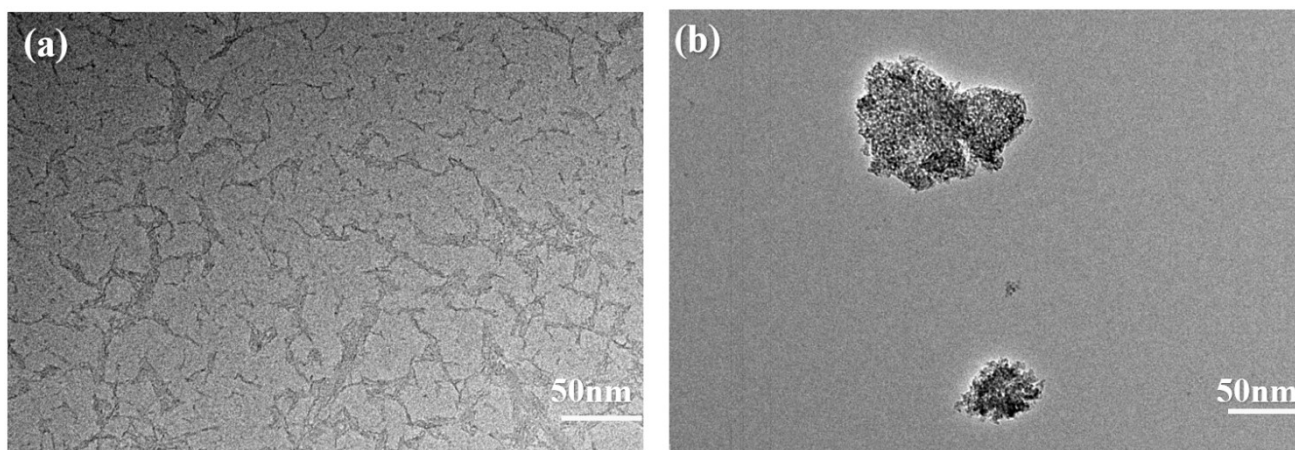

Appendix Fig. 1 TEM images of Al<sub>2</sub>O<sub>3</sub> sol (a) and Al<sub>2</sub>O<sub>3</sub> powder (b).

Appendix Table.1 Comparisons of the performance of Al<sub>2</sub>O<sub>3</sub> membrane with that of commercially available and literature-reported separation membranes.

| Membrane type                                                   | particle size ( nm ) | Pore size (nm) | Water contact angle (°) | Pure water flux (L·m <sup>-2</sup> ·h <sup>-1</sup> ) (0.1MPa) | Rejection (%)                                     | FRR (%)                                         | Ref.      |
|-----------------------------------------------------------------|----------------------|----------------|-------------------------|----------------------------------------------------------------|---------------------------------------------------|-------------------------------------------------|-----------|
| PES-N <sub>5</sub> / Al <sub>2</sub> O <sub>3</sub> particle    | 13-28                | 80             | 60.46±0.04              | 30.4                                                           | 96.92% (Rhodamine B)                              | 42.76%                                          | [15]      |
| PVDF-4/ Al <sub>2</sub> O <sub>3</sub> particle                 | 10                   | 55.82          | 58.97                   | ≈120                                                           | 96.45% (BSA)                                      | 72.6%                                           | [16]      |
| γ- ultrafiltration membrane/ Al <sub>2</sub> O <sub>3</sub> sol | 30                   | 6.8            | 58.4                    | 30.4                                                           | 96.8%(Methyl Blue)<br>96.2%(BSA)                  | /                                               | [17]      |
| PVDF-M <sub>1</sub> / Al <sub>2</sub> O <sub>3</sub> particle   | <50                  | /              | 62.45±2.5               | 598                                                            | ≈88%(Congo red)                                   | /                                               | [18]      |
| Pure PVDF*                                                      | /                    | 43.2           | 69±1.66                 | 148.8±8.6                                                      | 82.58% (NR 5),<br>85.88% (DB 79),<br>83.00% (BSA) | 73.56% (NR 5),<br>68.82%(DB79),71.67%(BSA)      | This work |
| Al <sub>2</sub> O <sub>3</sub> /PVDF(powder)-1.0                | 77.02±1.53           | 45.0           | 65±1.18                 | 184.8±9.7                                                      | 94.69% (NR 5),<br>94.39% (DB 79),<br>91.20% (BSA) | 89.21% (NR 5),<br>86.18%(DB79) ,<br>92.27%(BSA) | This work |
| Al <sub>2</sub> O <sub>3</sub> /PVDF(sol)-20 %                  | 9.81±0.05            | 47.1           | 64±1.07                 | 217.00±10.17                                                   | 96.13% (NR 5),<br>96.29% (DB 79),<br>96.93% (BSA) | 94.67% (NR 5),<br>92.54%(DB79),<br>95.55%(BSA)  | This work |

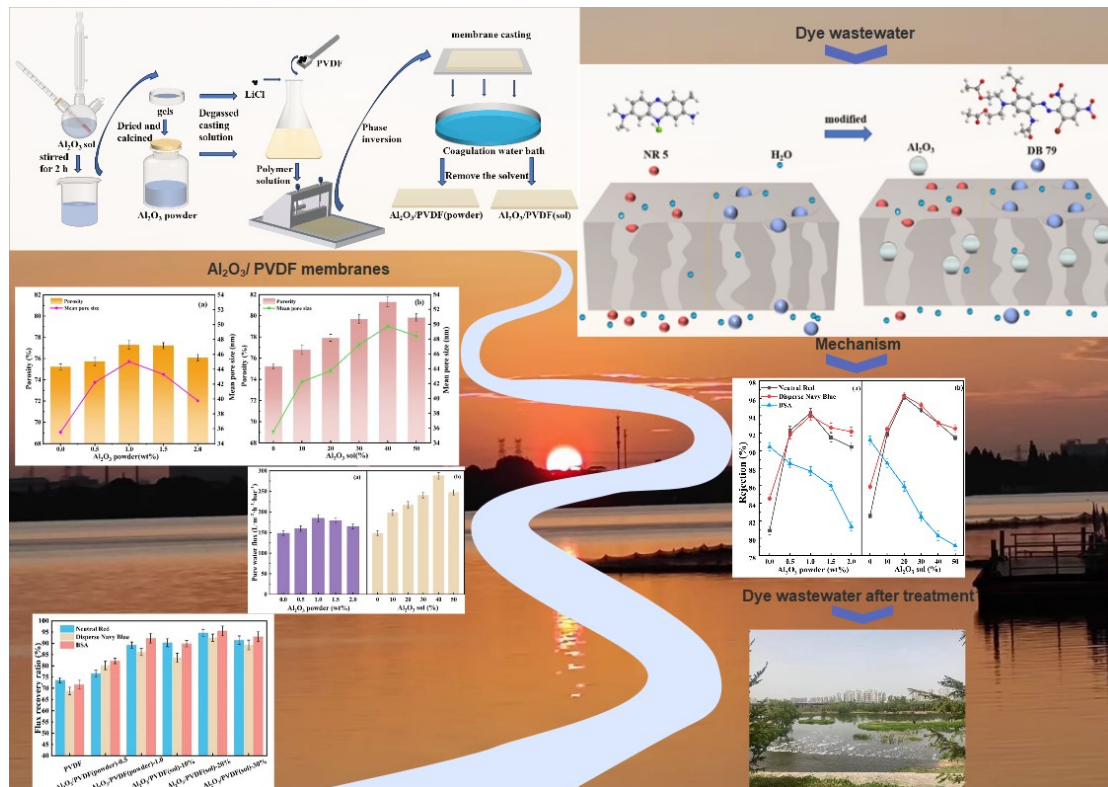

Appendix Fig. 2 Graphical abstract
